# Supplementary material for: Synthesis of a triptycene-containing dioxazine benzoxazine monomer and a main-chain triptycene-polydimethysiloxane-benzoxazine copolymer with excellent comprehensive properties
Source: Royal Society of Chemistry journal article supplement (doi:10.1039/d2py00244b), 2022-01-01
Supplement: d2py00244b1.pdf [file d2py00244b1.pdf]

*Supporting Information for*

**Synthesis of Triptycene-Containing Di-Oxazine Benzoxazine Monomer and  
Main-Chain Triptycene-Polydimethylsiloxane-Benzoxazine Copolymer with  
Excellent Comprehensive Properties**

Rui Yang,<sup>[a]</sup> Lin, Xie,<sup>[a]</sup> Nan Li,<sup>[a]</sup> Pablo Froimowicz,<sup>\*[b]</sup> and Kan Zhang<sup>\*[a]</sup>

*<sup>[a]</sup> Research School of Polymeric Materials, School of Materials Science and Engineering, Jiangsu University, Zhenjiang 212013, China*

*<sup>[b]</sup> Design and Chemistry of Macromolecules Group, Institute of Technology in Polymers and Nanotechnology (ITPN), UBA-CONICET, FADU, University of Buenos Aires, Intendente Güiraldes 2160, Pabellón III, subsuelo, Ciudad Universitaria (C1428EGA), Buenos Aires, Argentina*

\*: To whom correspondence should be addressed:

Pablo Froimowicz: [pablo.froimowicz@fadu.uba.ar](mailto:pablo.froimowicz@fadu.uba.ar)

Kan Zhang: [zhangkan@ujs.edu.cn](mailto:zhangkan@ujs.edu.cn)

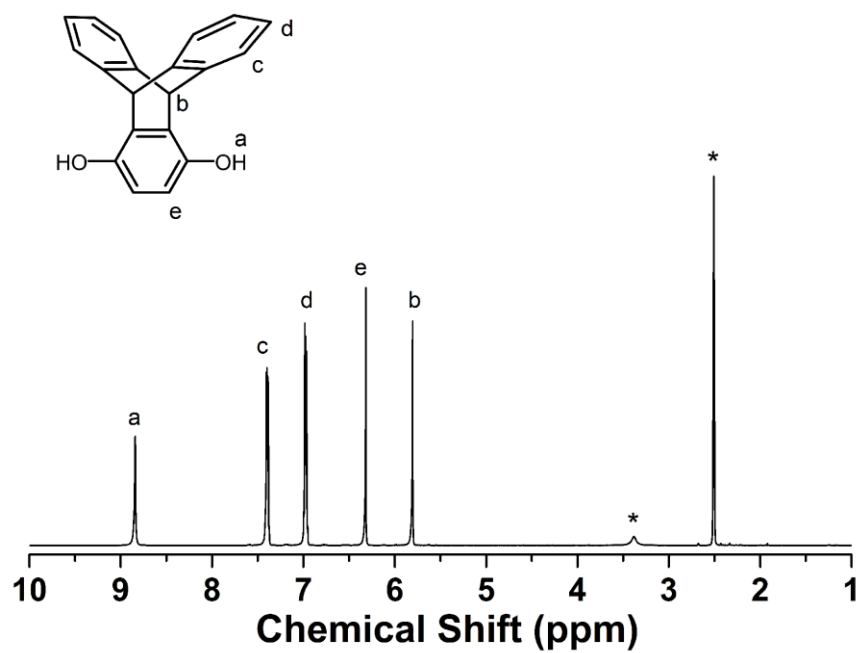

**Figure S1.** <sup>1</sup>H NMR spectrum of TB in DMSO-*d*<sub>6</sub>.

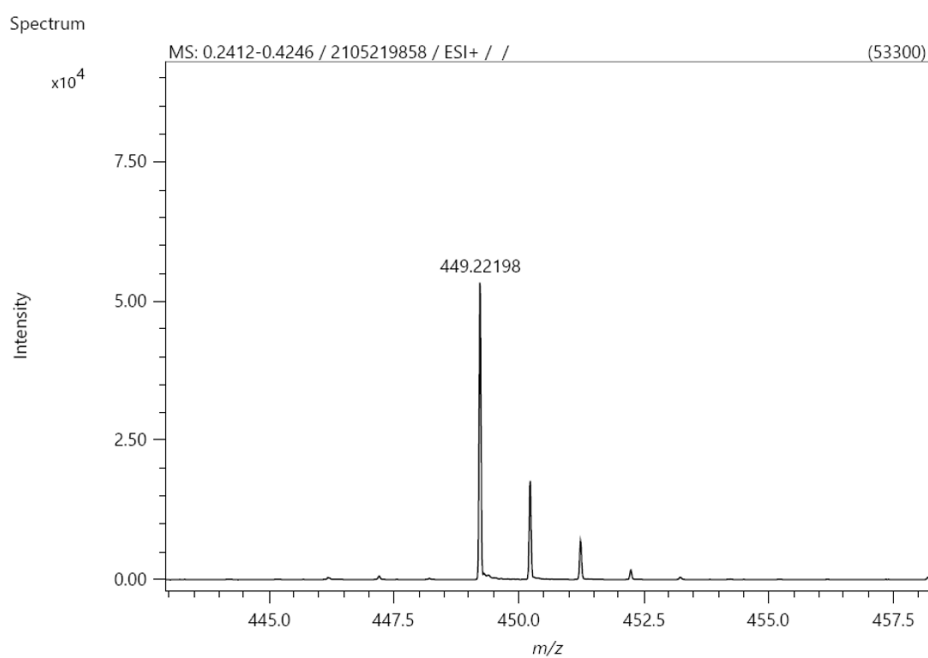

**Figure S2.** HRMS spectrum of TB-al.

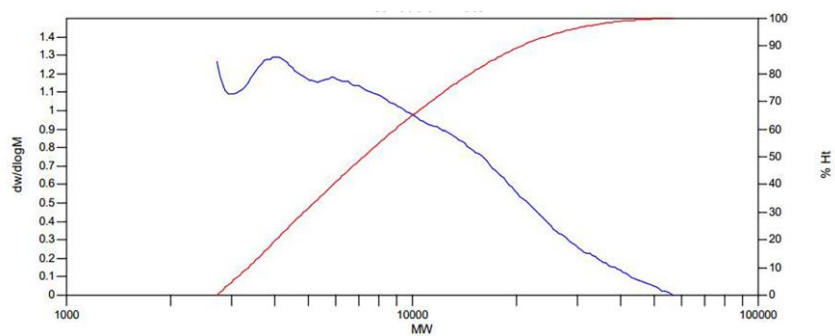

**Figure S3.** GPC distribution plots of TB-al-co-PDMS.

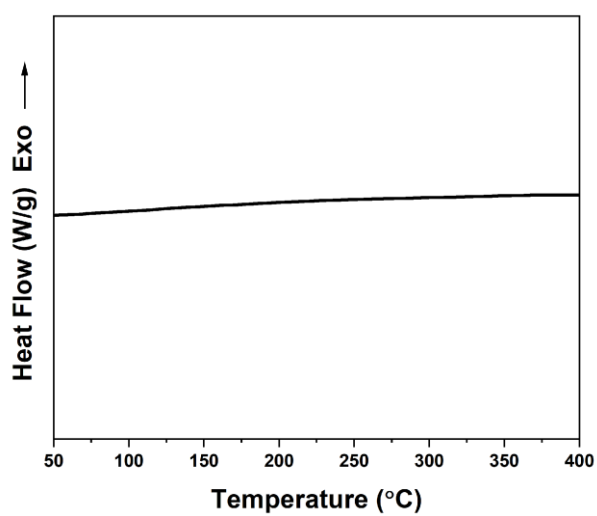

**Figure S4.** DSC thermogram of poly(TB-al-co-PDMS).

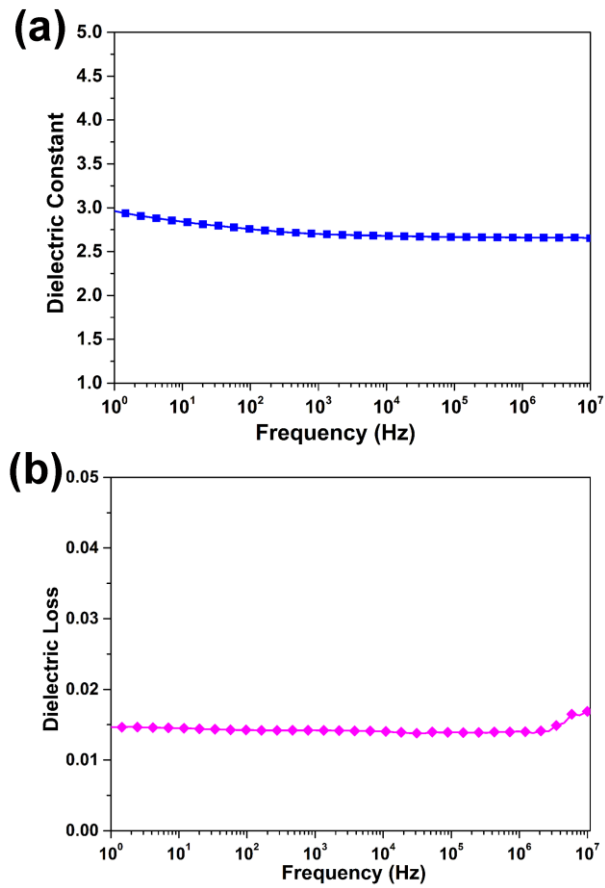

**Figure S5.** (a) Dielectric constant, (b) dielectric loss of **poly(TB-al-co-PDMS)** after 96 h of immersion in water as a function of frequency measured at room temperature.

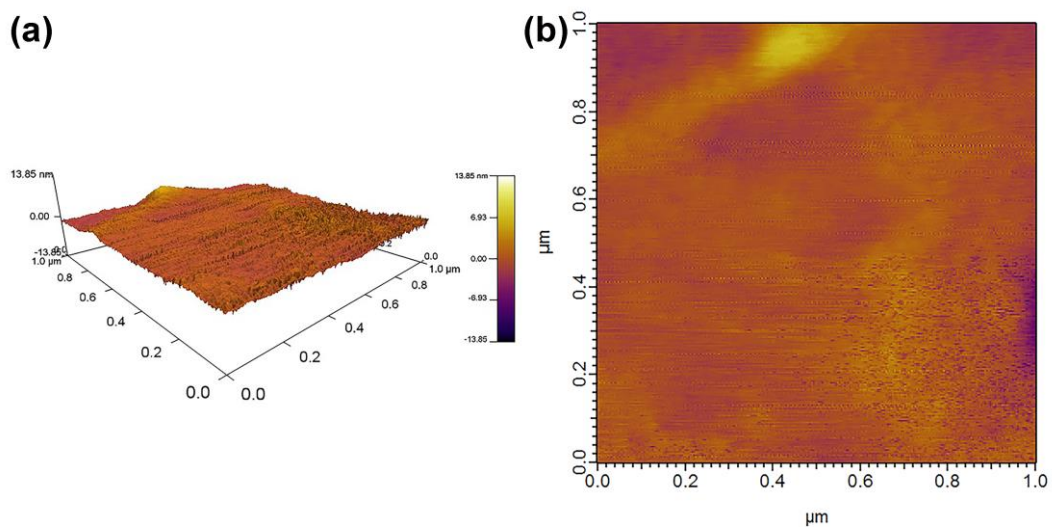

**Figure S6.** AFM images of **poly(TB-al-co-PDMS)** film.
